# Supplementary material for: Interactions, morphology and thermal stability of graphene-oxide reinforced polymer aerogels derived from star-like telechelic aldehyde-terminal benzoxazine resin
Source: Royal Society of Chemistry journal article supplement (doi:10.1039/c5ra16188f), 2015-01-01
Supplement: c5ra16188f1.pdf [file c5ra16188f1.pdf]

## Supporting Information (SI)

### **Interactions, Morphology and Thermal Stability of Graphene-Oxide Reinforced Polymer Aerogel Derived from Star-Like Telechelic Aldehyde- Terminal Benzoxazine Resin**

**Almahdi A. Alhwaige<sup>1,2,†,\*</sup>, Saeed M. Alhassan<sup>3</sup>, Marios S. Katsiotis<sup>3</sup>, Hatsuo Ishida<sup>2,\*</sup>,  
Syed Qutubuddin<sup>1,2,\*</sup>**

*<sup>1</sup>Department of Chemical and Biochemical Engineering, Case Western Reserve University,  
Cleveland, Ohio 44106-7217, USA*

*<sup>2</sup>Department of Macromolecular Science and Engineering, Case Western Reserve University,  
Cleveland, OH 44106-7202, USA*

*<sup>3</sup>Department of Chemical Engineering, The Petroleum Institute, United Arab Emirates*

---

\*Corresponding authors: [aaa148@case.edu](mailto:aaa148@case.edu) (Almahdi Alhwaige), [sxq@case.edu](mailto:sxq@case.edu) (Syed Qutubuddin), and [hxi3@case.edu](mailto:hxi3@case.edu) (Hatsuo Ishida).

† On leave from Al-Mergib University, Libya ([aaalhwaige@elmergib.edu.ly](mailto:aaalhwaige@elmergib.edu.ly)).

## **1. EXPERIMENTAL SECTION**

### **1.1. Reagents**

Graphite powder (micro 850) was kindly obtained from Asbury Graphite Mills, Inc. polyetheramine (Star-like jeffamine T-403,  $M_n = 403$  g/mol) was kindly supplied by Huntsman. Tetraethylenepentamine (TEPA), 4-hydroxybenzaldehyde, 4HBA, (98%), and paraformaldehyde, (96%) were purchased from Sigma-Aldrich Chemicals (USA). Concentrated sulfuric acid ( $H_2SO_4$ , 98%), potassium permanganate ( $KMnO_4$  crystal), hydrogen peroxide ( $H_2O_2$ , 30% aqueous solution), concentrated hydrochloric acid (HCl), and glacial acetic acid ( $CH_3COOH$ ), 1,4-dioxane, chloroform, and dimethylsulfoxide (DMSO) were purchased from Fisher Scientific (USA). All chemicals were used without further purification.

### **1.2. Preparation of Graphene Oxide (GO)**

Graphene oxide was synthesized from natural graphite powder by the modified Hummer's method, as described in the literature.<sup>1,2</sup> In brief, 3g natural graphite powder was added to 120 ml concentrated  $H_2SO_4$  (98%) under stirring in an ice-bath (0 °C). Next, 15 g of  $KMnO_4$  was added slowly under stirring. To control the temperature below 20° C,  $KMnO_4$  was added gradually. The ice-bath was then taken-off and the system was heated at 35 °C for 2 h. Then, 250 ml deionized water was gradually added into the system and left under stirring for another 2 h. Then a solution of 700 mL deionized water with 120 mL 30 %  $H_2O_2$  aqueous solution was added gradually to reduce the residual  $KMnO_4$  till no bubble appeared. The color of mixture changed into brilliant yellow along with bubbling. The mixture was filtered and washed twice with 1:10 HCl aqueous solution (1L) to remove metal ions followed by 1 L of deionized water to remove acid. Finally, the solution was filtered resulting in a yellow-brown filter cake, which was washed by deionized

water until the pH value of the suspension reached near 7, and then graphene oxide was dried under vacuum for 48 h at 60 °C.

### 1.3. Preparation of Benzoxazine Precursor, SLTB(4HBA-t403)

The star-like telechelic benzoxazine (SLTB(4HBA-t403)) based on 4HBA and T-403 as shown in Scheme S1. Typically, T-403 (15 g, 34.09 mmol), 4-hydroxybenzaldehyde, 4HBA, (12.75 g, 102.27 mmol), paraformaldehyde, PF, (6.398 g, 204.55 mmol), and 1,4-dioxane 170 mL were introduced into a round 500 ml glass flask equipped with a condenser and a magnetic stirrer. The mixture was stirred at 90 °C for 6h. The product was precipitated in deionized water and filtered. The product was dissolved in chloroform and washed three times with 0.3 M NaHCO<sub>3</sub>, and then washed three times with deionized water. The collected solution was dried using sodium sulfate anhydrous, and then the solvent evaporated using a rotary evaporator at 60 °C to give brown product of the benzoxazine monomer which is abbreviated hereinafter as SLTB(4HBA-t403) (24.68 g).

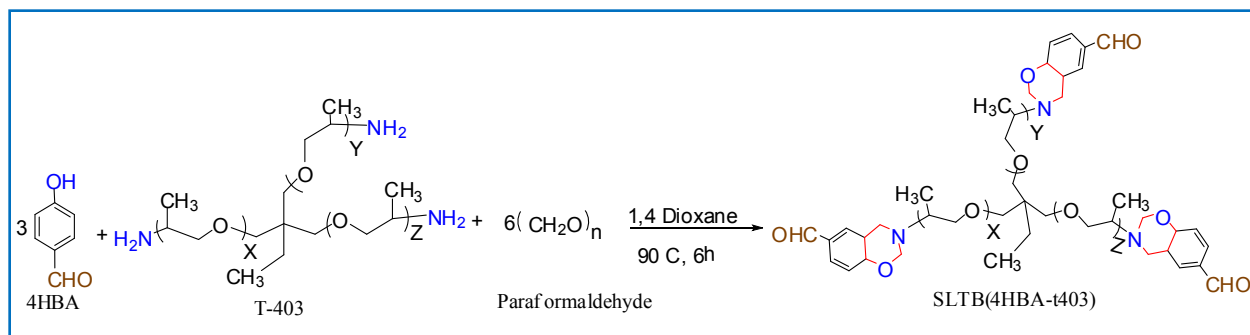

**Scheme S1.** Synthesis of star-like telechelic benzoxazine monomer, SLTB(4HBA-t403).

## 1.4. Characterizations

Fourier-transform infrared (FT-IR) spectroscopy was used to investigate the oxidation of graphene, polymerization of benzoxazine and the interactions between benzoxazine and graphene oxide. FT-IR spectra were obtained using a Bomem Michelson MB-100 FT-IR spectrometer with a dry air purging unit and a deuterated triglycine sulfate detector at a resolution of  $4\text{ cm}^{-1}$ .

Proton nuclear magnetic resonance ( $^1\text{H-NMR}$ ) spectroscopy was used to conform the benzoxazine structure.  $^1\text{H-NMR}$  spectra were taken on a Varian Gemini 2000 NMR operating at a proton frequency of 300 MHz. Deuterated chloroform was used as a solvent and tetramethylethylsilane was used as an internal standard.

## 2. RESULTS AND DISCUSSION

### 2.1. Preparation of Graphene Oxide, GO

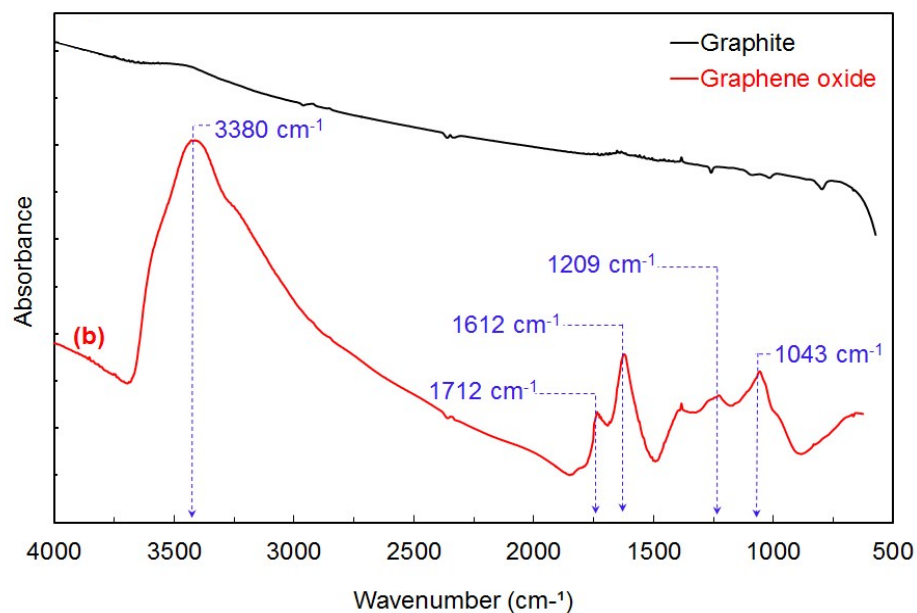

**Figure S1.** FT-IR spectra of: (a) graphite and (b) graphene oxide.

## 2.2. Confirmation and Polymerization of Benzoxazine Precursor, SLTB(4HBA-t403)

The structure of SLTB(4HBA-t403) has been confirmed by  $^1\text{H-NMR}$  and FT-IR spectra.  $^1\text{H-NMR}$  spectra depicted in Fig. S2 shows the characteristic resonances assigned to oxazine structure at 4.08 ppm (Ar-CH<sub>2</sub>-N) and 4.98 ppm (N-CH<sub>2</sub>-O).<sup>3-5</sup> The aromatic protons were observed as multiple signals from 6.88 to 7.69 ppm.<sup>4,5</sup> The resonance at 7.25 ppm is assigned to a solvent peak (chloroform) [4]. The resonance peaks in the range 3.3-3.7 ppm were assigned to the methylene of (O-CH<sub>2</sub>-) groups of the poly(propylene oxide) structure. The signals from 1.1 to 1.3 ppm are due to the methyl group (-CH<sub>3</sub>) in the poly(propylene block).<sup>6,7</sup> The resonance at 9.83 ppm is assigned to the proton of the aldehyde group.<sup>8,9</sup>

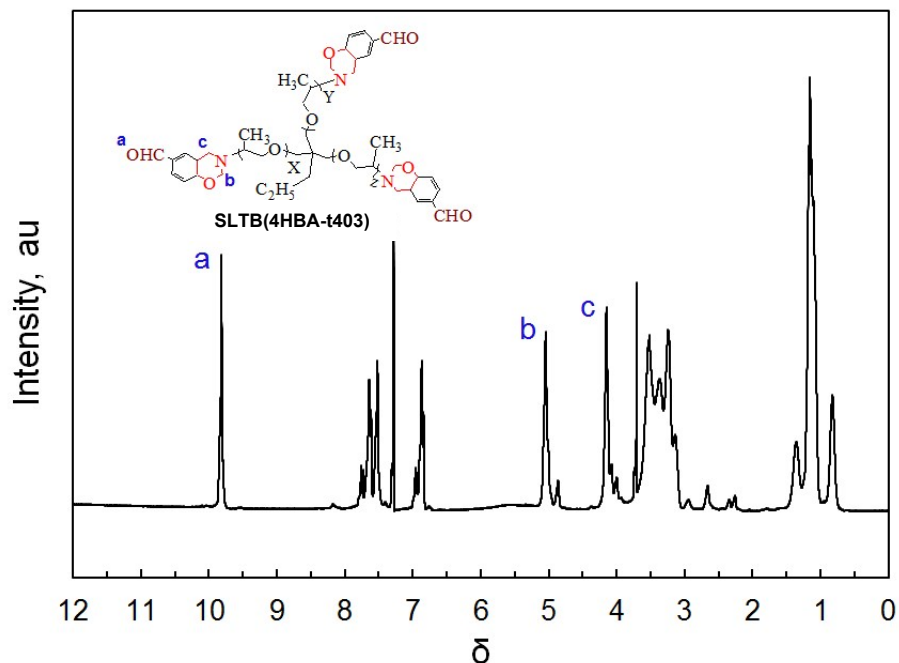

**Figure S2**  $^1\text{H-NMR}$  spectra of aldehyde star-like benzoxazine monomer, SLTB(4HBA-t403).

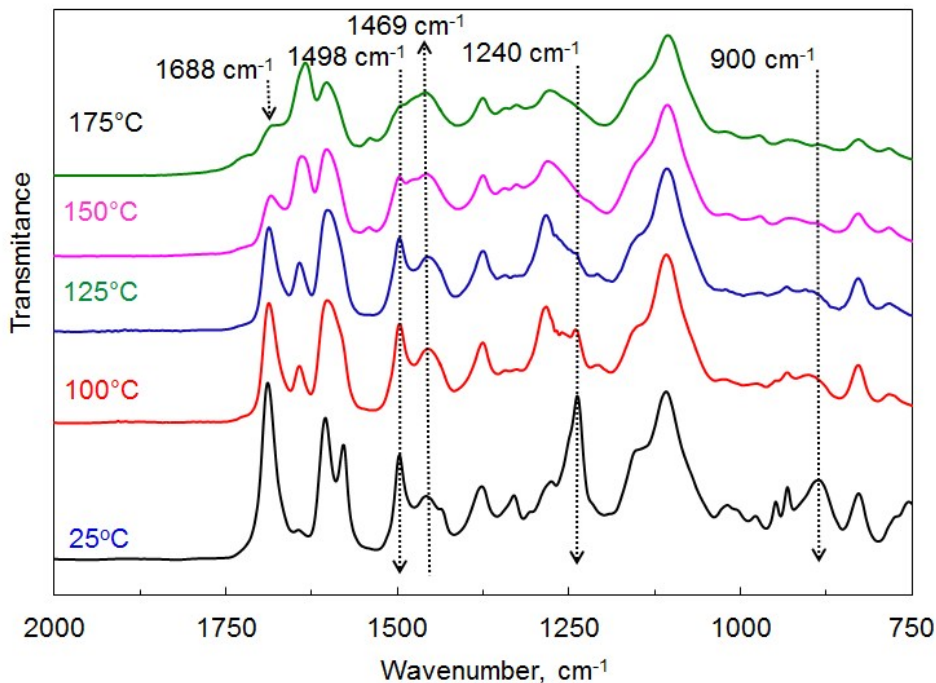

**Figure S3** FT-IR spectra of aldehyde star-like benzoxazine monomer, SLTB(4HBA-t403). The FT-IR spectra were taken of casting a film from solution of monomer in chloroform onto a KBr crystal after each thermal treatment of 25, 100, 125, 150, and 175 °C for 2h/each.

FT-IR was used to confirm the formation and ring-opening polymerization of SLTB(4HBA-t403). Fig. S3 illustrates the room temperature spectrum of SLTB(4HBA-t403) along with the spectral evolution at various thermal treatments. The room temperature spectrum shows characteristic absorption bands of benzoxazine structure at 930  $\text{cm}^{-1}$  due to the out-of-plane bending vibration of the benzene ring that is attached to the oxazine ring (C-H),<sup>3</sup> and the bands at 1240  $\text{cm}^{-1}$  due to antisymmetric stretching of C-O-C, and the wave-numbers at 1336  $\text{cm}^{-1}$  ( $\text{CH}_2$  wagging). Also the band at 1498  $\text{cm}^{-1}$  that is attributed to the trisubstituted benzene ring was observed.<sup>4,5</sup> In addition, the characteristic peak at 1688  $\text{cm}^{-1}$  is due to the aldehyde groups on the monomer structure.<sup>8,9</sup> Further, the strong absorption band can be detected at 1114  $\text{cm}^{-1}$ , which is

ascribed to the antisymmetric (C-O-C) stretching vibration in polyether chain.<sup>6,7</sup> As a result of thermal treatment of SLTB(4HBA-t403), the ring opening polymerization of benzoxazine led to the formation of cross-linked structure of poly(SLTB(4HBA-t403)) and the typical adsorption bands of benzoxazine were gradually reduced and almost disappeared with heat treatment, while tetra-substituted benzene mode at 1469 cm<sup>-1</sup> increased as shown in Fig. S3.<sup>3-5</sup> Therefore, the change from tri-substituted to tetra-substituted benzene ring during the ring opening polymerization was confirmed.

### 2.2.1. Effect of GO on polymerization behavior of benzoxazine monomer

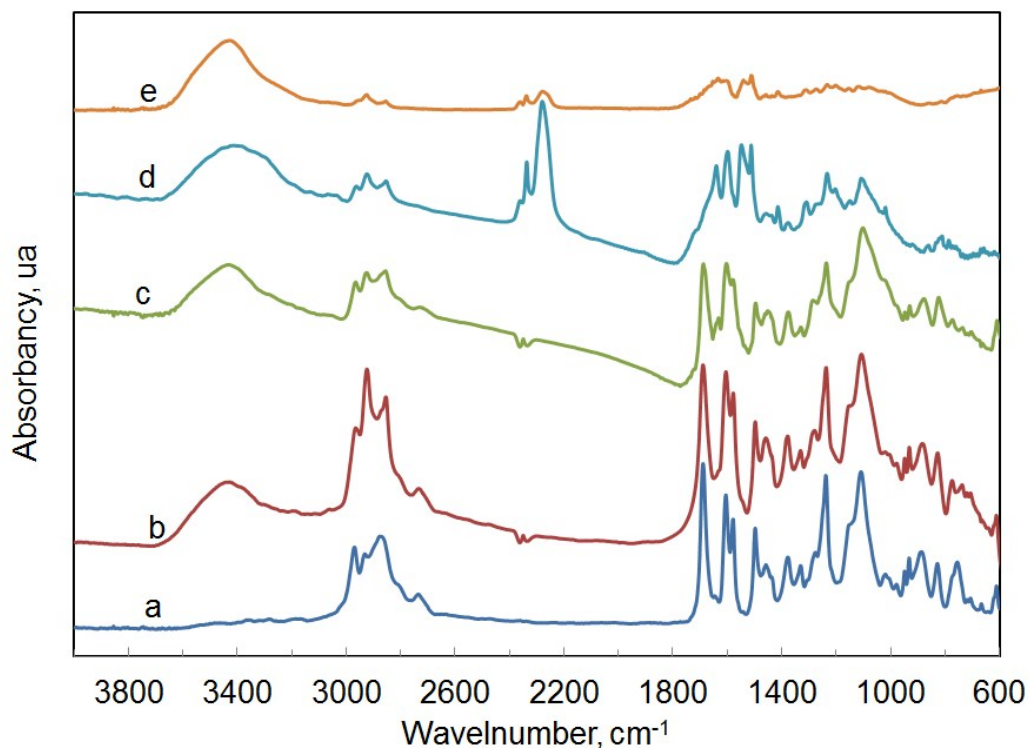

**Figure S4** FT-IR spectra of SLTB(4HBA-t403)/GO-5% at various heat treatments: **(a)** neat SLTB(4HBA-t403) at 75 °C, **(b)**, **(c)**, **(d)**, and **(e)** SLTB(4HBA-t403)/GO-5% after heat treatment up to 60 °C, 160 °C, 175 °C, and 900 °C, respectively.

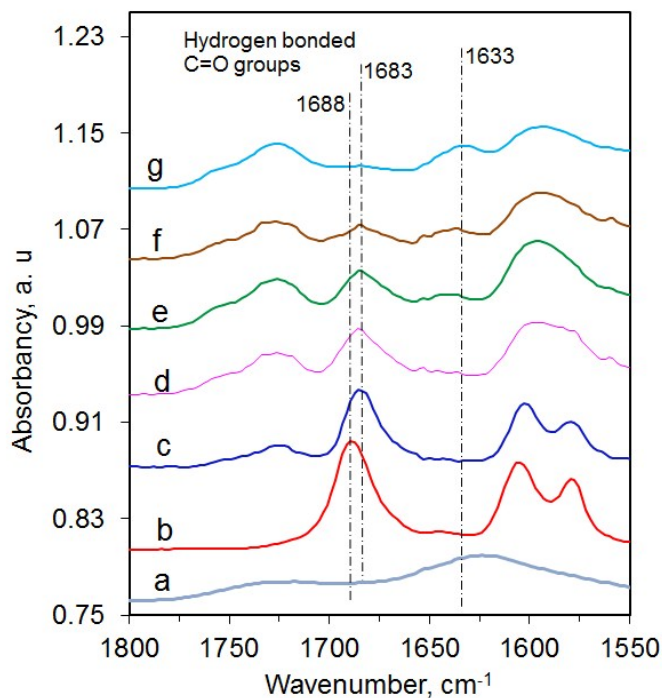

**Fig. S5** FT-IR spectra of hydrogen-bonding of GO and SLTB(4HBA-t403) recorded at various temperatures between 1550 and 1800  $\text{cm}^{-1}$ : (a) neat GO, (b) neat SLTB(4HBA-t403), (c), (d), (e), and (f) SLTB(4HBA-t403)/GO (40/60 weight percent) at 25, 100, 125, and 175  $^{\circ}\text{C}$ , respectively.

## REFERENCES

- [1] A. A. Alhwaige, H. Ishida, T. Agag, and S. Qutubuddin, *RSC Adv.* 2013, **3**, 16011-16020.
- [2] N. Zhang, H. Qiu, Y. Si, W. Wang, and J. Gao, *Carbon* 2011, **49**, 827-837.
- [3] J. Dunkers, and H. Ishida, *Spectrochim. Acta* 1995, **51A**, 1061-1074.
- [4] H. Ishida, in Handbook of Benzoxazine Resins, H. Ishida, and T. Agag, Eds., Elsevier, Amsterdam 2011, 3-81.
- [5] N. N. Ghosh, B. Kiskan, and Y. Yagci, *Prog. Polym. Sci.* 2007, **32**, 1344-1391.



- [6] T. Agag, S. Geiger, S. M. Alhassan, S. Qutubuddin, and H. Ishida, *Macromolecules*, 2010, **43**, 7122-7127.
- [7] C. Sawaryn, K. Landfester, and A. Taden, *Macromolecules*, 2010, **43**, 8933-8941.
- [8] Q. C. Ran, Q. Tian, C. Li, and Y. Gu, *Polym. Adv. Technol.* 2010, **21**, 170-176.
- [9] Q. C. Ran, and Y. Gu, *J. Polym. Sci. Part A: Polym. Chem.* 2011, **49**, 1671-1677.
